# Supplementary material for: Exploring the heterogeneity of effects of corticosteroids on acute respiratory distress syndrome: a systematic review and meta-analysis
Source: PubMed Central journal article supplement (PMC4056095; doi:10.1186/cc13819), 2014-04-07

## Additional file-2

### **Exploring the heterogeneity of effects of corticosteroids on ARDS: a systematic review and meta-analysis**

*Sheng-Yuan Ruan, MD; Hsien-Ho Lin, MD, ScD; Chun-Ta Huang, MD; Ping-Hung Kuo, MD; Huey-Dong Wu, MD; and Chong-Jen Yu, MD, PhD*

**e-Figure 1.** Funnel plot for outcome of mortality in randomized controlled trials. A p-value of 0.90 for Begg's test and 0.86 for Egger's test

**e-Figure 2.** Funnel plot for outcome of mortality in cohort studies. A p-value of 0.47 for Begg's test and 0.30 for Egger's test

**e-Figure 1.** Funnel plot for outcome of mortality in randomized controlled trials. A p-value of 0.90 for Begg's test and 0.86 for Egger's test.

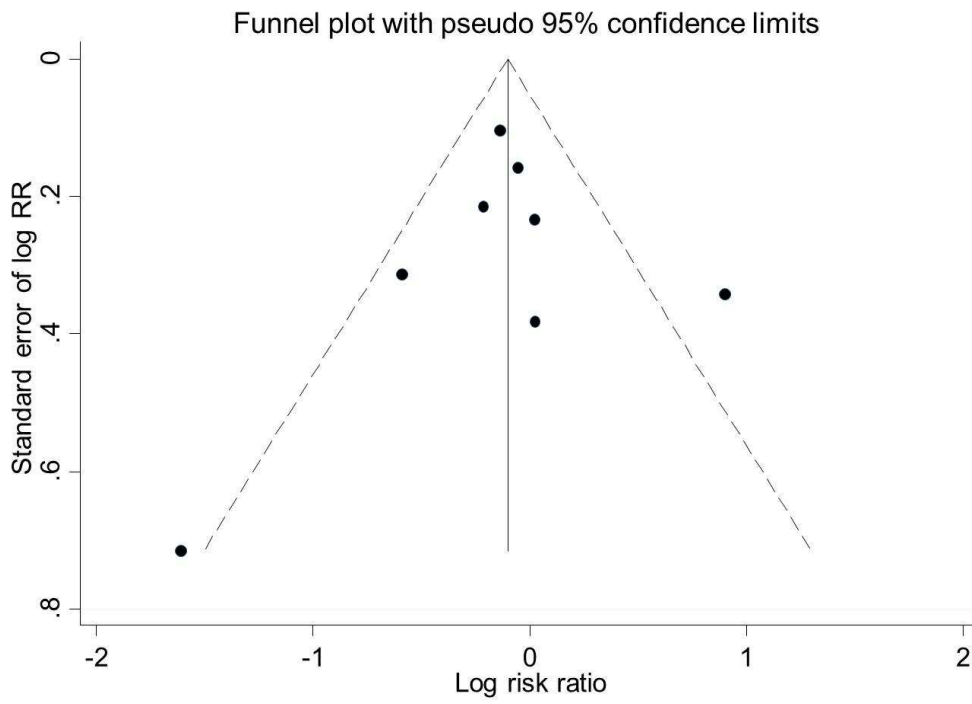

**e-Figure 2.** Funnel plot for outcome of mortality in cohort studies. A p-value of 0.47 for Begg's test and 0.30 for Egger's test.

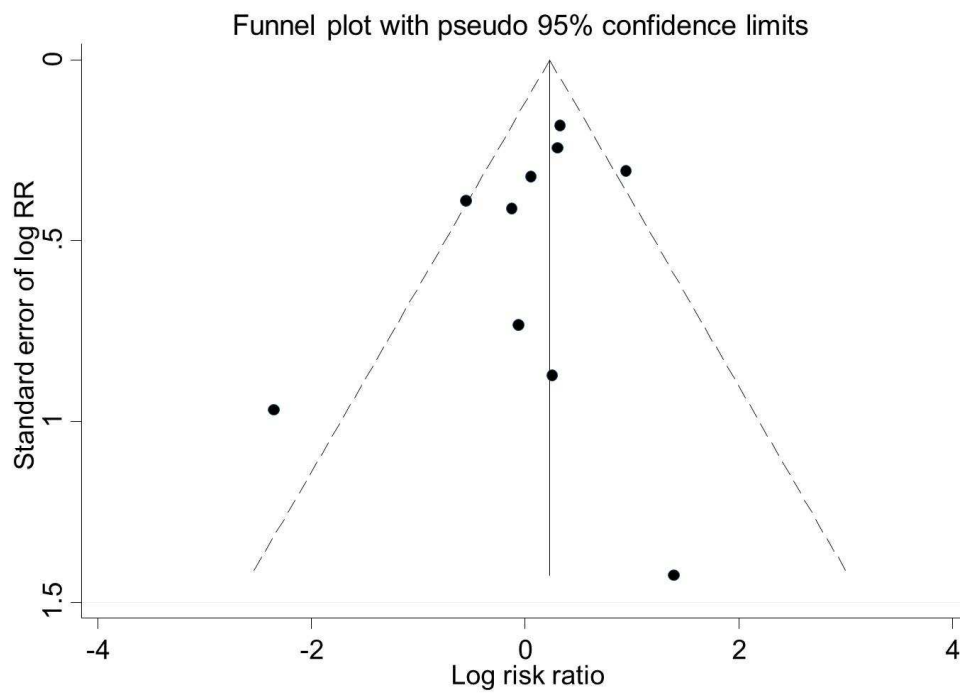

Supplement: cc13819-S2.pdf [file cc13819-S2.pdf]
